# Supplementary material
Source: PubMed Central journal article supplement (PMC4457506)
Supplement: NIHMS622585-supplement-supp_figures.pdf [file NIHMS622585-supplement-supp_figures.pdf]

Microarray analysis of HTS formation. Wildtype wounds at day 6 ( $\pm 48$  hours loading) and day 14 post-injury ( $\pm 10$  days loading) were analyzed. **(a)** Hierarchical clustering of 1,046 differentially expressed genes (day 6=189 genes, day 14=847 genes, both day 6 and 14=73 genes). Rows=genes; columns=samples (n=4/group). Yellow and blue indicate up- and down-regulation, respectively. **(b)** Gene ontology categories significantly altered by loading. Number of genes/category italicized. **(c)** Ingenuity Pathways Analysis-constructed transcriptome networks. Solid=direct; dashed=indirect interactions; orange=internet network connections. **(d)** Schematic of potential mechanotransduction pathways in fibrosis. **(e)** Immunoblot quantification of FAK activation following injury and/or loading. n=3. Values represent means  $\pm$  s.e.m.; \*p=0.05, †p<0.001.

## Supplementary Figure 2

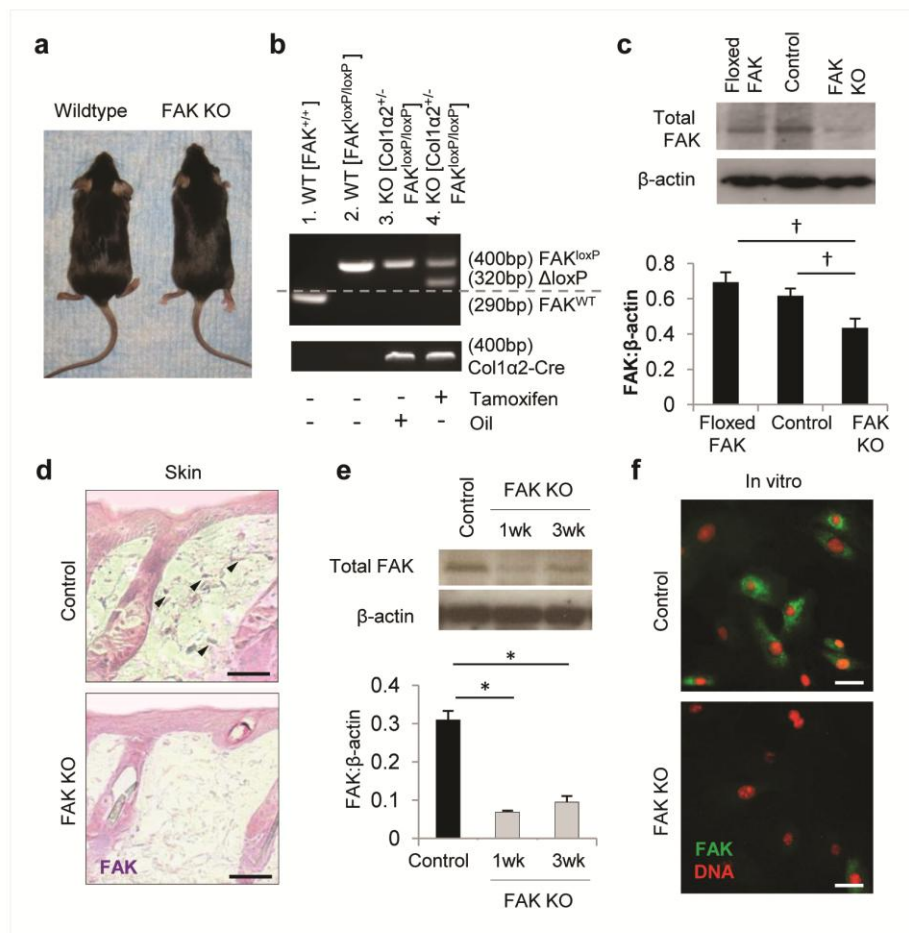

Validation of FAK KO mice. **(a)** Photograph of age-matched wildtype and FAK KO mice. **(b)** PCR confirmation of tamoxifen-dependent excision of FAK. ‘FAK<sup>loxP</sup>’ is floxed FAK band, ‘ΔloxP’ is recombined band after FAK excision, ‘FAK<sup>WT</sup>’ is wildtype band. **(c)** Quantification of FAK densitometry from unwounded skin. n=6. **(d)** Immunolocalization of FAK in unwounded skin. Arrowheads point to dermal FAK signal. Scale bar 50 μm. **(e)** Quantification of FAK densitometry from harvested primary dermal fibroblasts at 1 and 3 weeks post-tamoxifen induction. n=6. **(f)** FAK immunofluorescence images of adult dermal fibroblasts in vitro. Scale bar 50 μm. Values represent means ± s.e.m. \*p<0.001; †p<0.01.

### Supplementary Figure 3

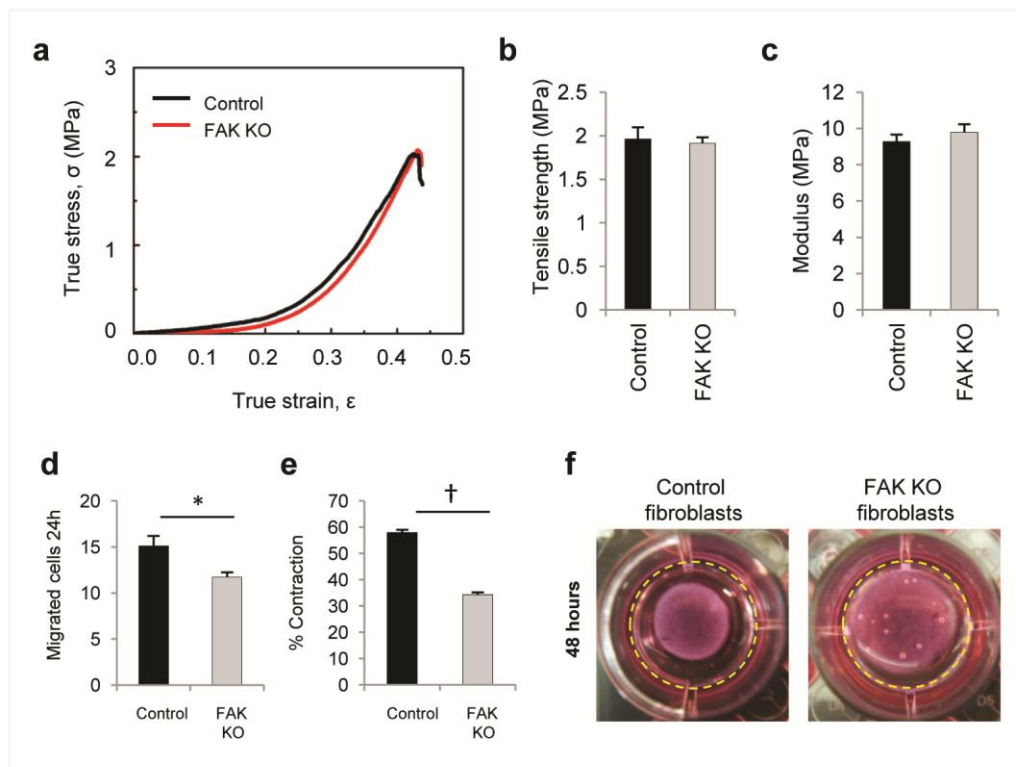

Studying FAK mechanotransduction. **(a)** Representative stress-strain profile of day 10 incisions from FAK KO (red) and control (black) mice. **(b)** Ultimate tensile strength and **(c)** wound stiffness were similar between control and FAK KO incisions.  $n=4$ . In vitro migration and contraction assays. **(d)** Primary dermal fibroblasts harvested from FAK KO mice demonstrated impaired motility after 24 hours in a scratch migration assay.  $n=14$ . **(e)** FAK KO fibroblasts also demonstrated a significant reduction in contraction in 3D collagen lattices after 48 hours.  $n=9$ . **(f)** Representative photographs of collagen lattices for the respective conditions. Values represent means  $\pm$  s.e.m. \* $p<0.01$ ; † $p<0.001$ .

## Supplementary Figure 4

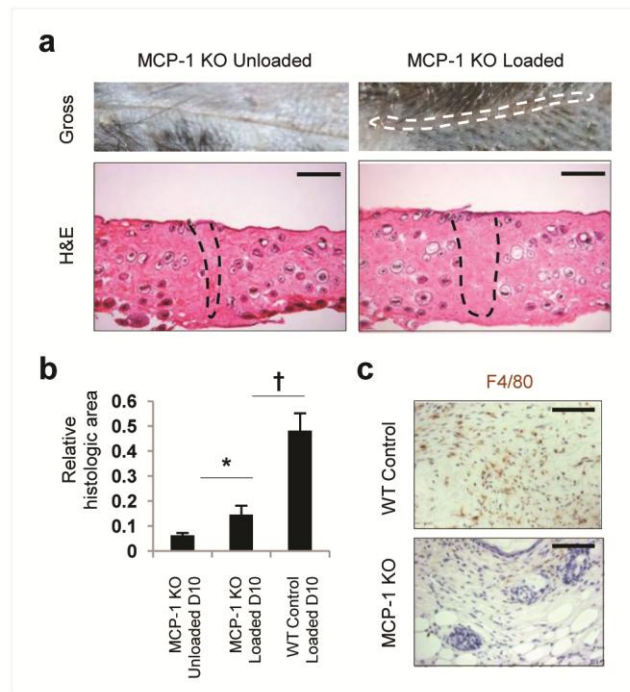

Application of HTS model to MCP-1 KO mice. **(a)** Representative gross and H&E-stained histologic images of unloaded and loaded scars at day 10 post-injury in global MCP-1 KO mice. Dashed line demarcates scar boundary.  $n=6$ . **(b)** Quantification of histologic scar area. **(c)** Immunolocalization of F4/80+ macrophages.  $n=6$ . Scale bar 100  $\mu\text{m}$ . Values represent means  $\pm$  s.e.m.; scale bar 0.5 cm gross photographs; 200  $\mu\text{m}$  in a and c. \* $p<0.05$ ; † $p<0.01$ .

## Supplementary Figure 5

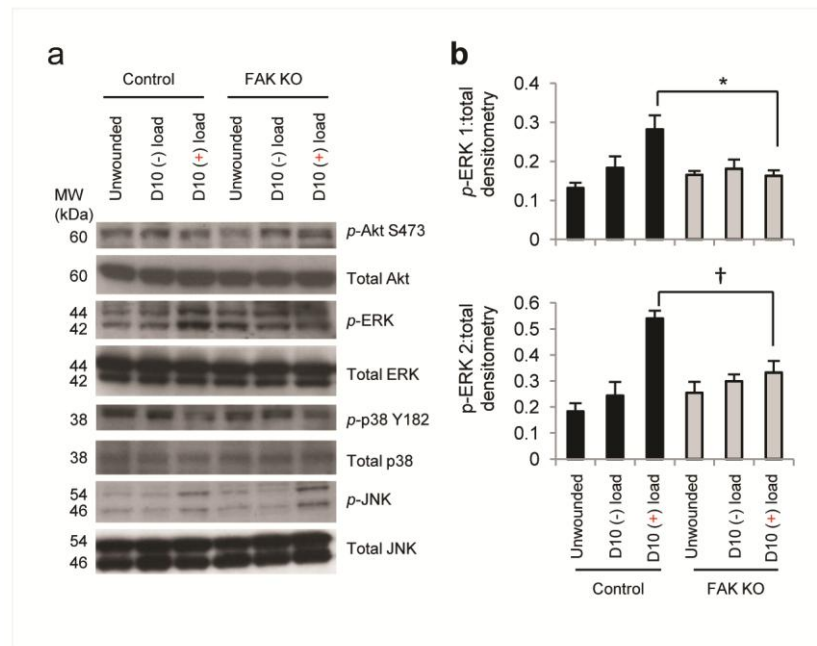

Immunoblot analysis of mechanotransduction pathways in scar formation. **(a)** Representative immunoblots of unwounded skin, unloaded incisions and loaded scars in control and FAK KO mice. The intracellular kinases Akt, ERK, p38 and JNK are suspected downstream mediators of FAK signaling. **(b)** Only ERK activation was differentially regulated by FAK mechanotransduction, implicating a potential FAK-ERK axis in the mechanical induction of fibrosis and scar formation. Values represent means  $\pm$  s.e.m.  $n=3$ . \* $p<0.05$ , † $p<0.01$ .



## Supplementary Figure 6

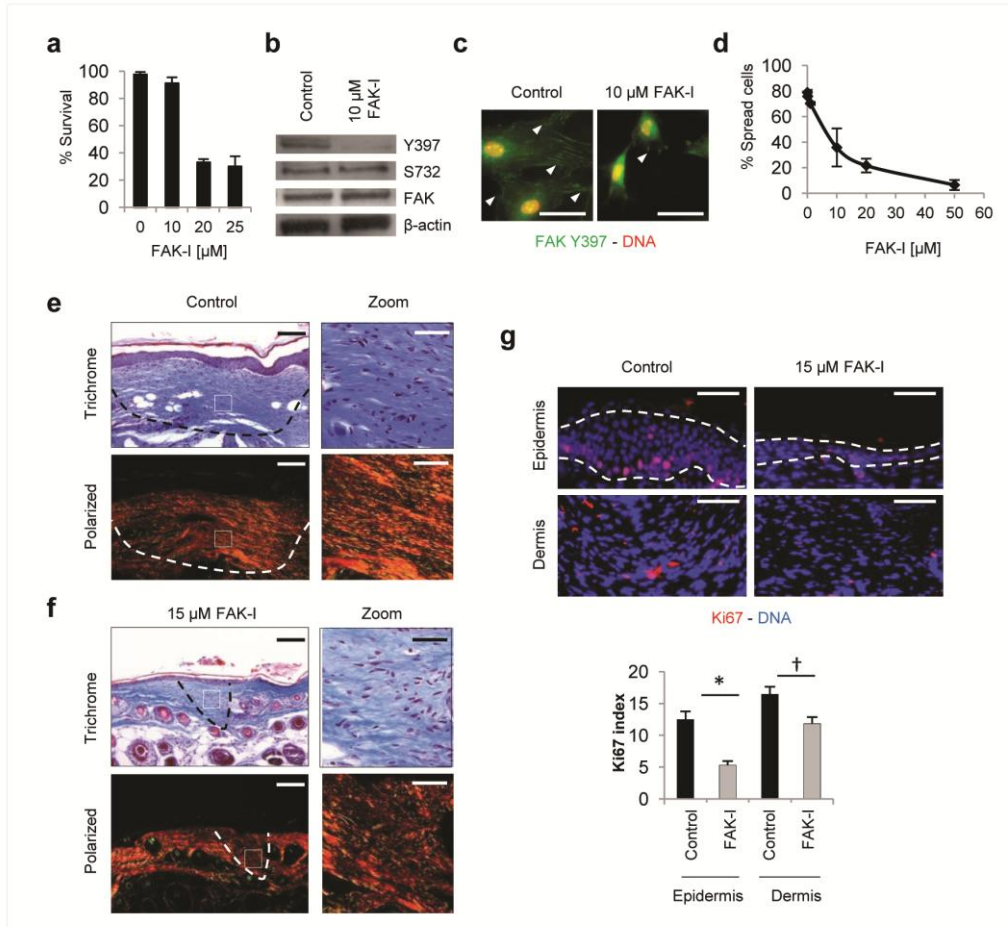

Small molecule inhibition of FAK using PF573228 in vitro and in vivo. **(a)** Fibroblast survival based on live/dead assay following different doses of PF573228. **(b)** Immunoblot demonstrating FAK Y397 specificity. FAK activation at S732 is not impaired. **(c)** PF573228 markedly impairs immunolocalization of FAK Y397 (arrowheads) in plated fibroblasts. Scale bar 50  $\mu$ m. **(d)** Fibroblast morphology and attachment is impaired with application of PF573228. **(e–f)** Trichrome-stained and polarized light analysis of FAK inhibitor-treated scars at day 10 post-injury. Dashed line demarcates scar boundary. Scale bar 100  $\mu$ m (zoom is 20  $\mu$ m). **(g)** Quantification of scar proliferation (% of Ki67+ cells). Dashed line outlines epidermis. n=6. Values represent means  $\pm$  s.e.m.; \*p<0.01, <sup>†</sup>p<0.05.

## Supplementary Figure 7

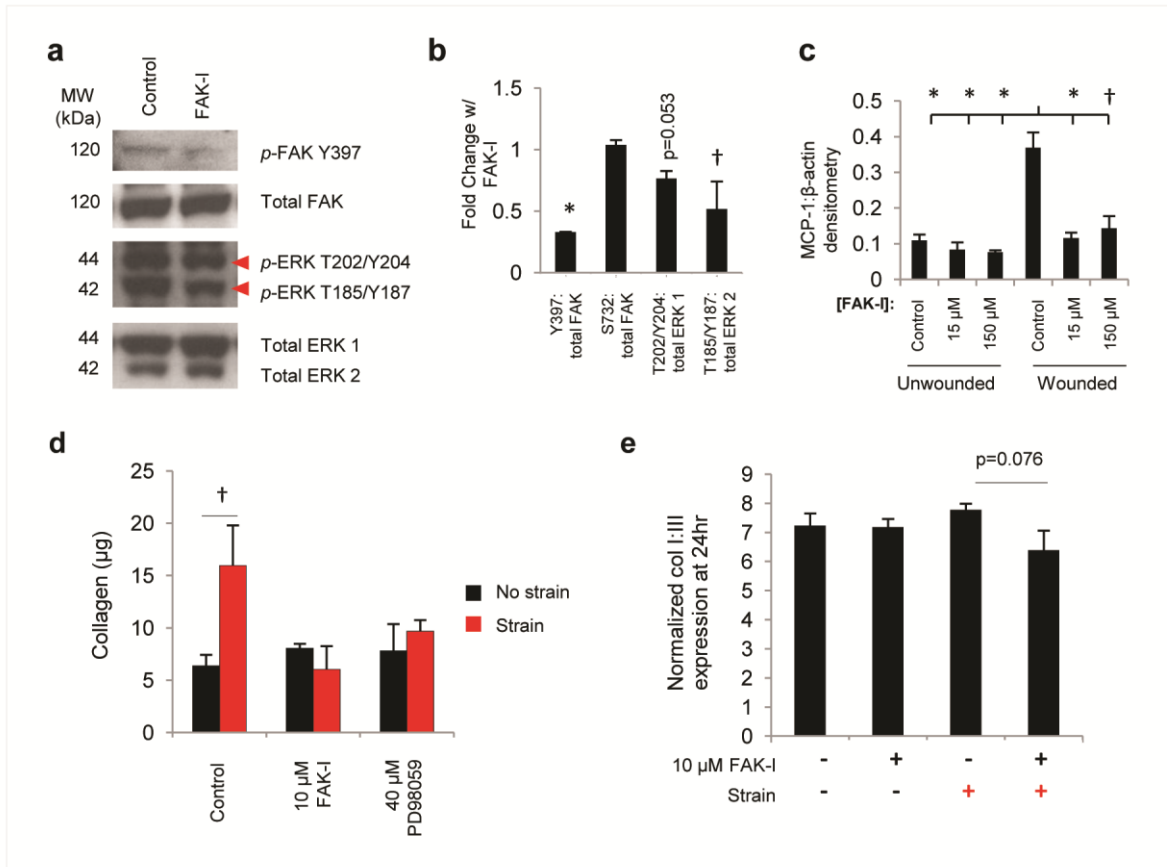

Small molecule inhibition of FAK-mediated pathways. **(a–b)** Immunoblot analysis of FAK and ERK activation in post-injury day 10 scars. Red arrowheads point to decreased ERK phosphorylation. Fold change represents values relative to vehicle injection. n=4. **(c)** Immunoblot analysis of MCP-1 levels following application of small molecule FAK inhibitor in vivo. n=3. **(d)** 24 hours of mechanical strain activated human fibroblast secretion of total collagen in vitro. Inhibition of FAK (PF573228) or ERK (PD98059) significantly blocked this effect. n=4. **(e)** Strain-induced human fibroblast gene expression of collagen I (thicker):collagen III (thinner) with inhibition of FAK. Values normalized to β-actin. n=6. Values represent means ± s.e.m. \*p<0.01, †p<0.05.



**Supplementary Table 1:** Microarray-based list of 73 gene targets significantly regulated by mechanical loading at both day 6 and day 14 post-injury (false discovery rate < 2 for both time points).

| Gene               |                                                                         | Fold change |        |
|--------------------|-------------------------------------------------------------------------|-------------|--------|
|                    |                                                                         | Day 6       | Day 14 |
| <i>Adam12</i>      | ADAM metallopeptidase domain 12                                         | 2.28        | 10.09  |
| <i>Agpat9</i>      | 1-acylglycerol-3-phosphate O-acyltransferase 9                          | 0.58        | 0.24   |
| <i>Akr1b15</i>     | aldo-keto reductase family 1, member B15                                | 1.51        | 3.23   |
| <i>Arsi</i>        | arylsulfatase family, member I                                          | 2.18        | 2.45   |
| <i>Bgn</i>         | biglycan                                                                | 1.52        | 3.37   |
| <i>Ccr5</i>        | chemokine (C-C motif) receptor 5                                        | 1.49        | 2.02   |
| <i>Ckap4</i>       | cytoskeleton-associated protein 4                                       | 2.02        | 3.05   |
| <i>Clec11a</i>     | C-type lectin domain family 11, member A                                | 2.17        | 3.99   |
| <i>Col14a1</i>     | collagen, type XIV, alpha 1                                             | 1.95        | 3.75   |
| <i>Col1a2</i>      | collagen, type I, alpha 2                                               | 1.89        | 4.59   |
| <i>Col5a1</i>      | collagen, type V, alpha 1                                               | 1.64        | 6.83   |
| <i>Col5a2</i>      | collagen, type V, alpha 2                                               | 1.63        | 9.06   |
| <i>Col8a1</i>      | collagen, type VIII, alpha 1                                            | 2.52        | 29.35  |
| <i>Csgalnact1</i>  | chondroitin sulfate N-acetylgalactosaminyltransferase 1                 | 1.97        | 1.98   |
| <i>Csrp2</i>       | cysteine and glycine-rich protein 2                                     | 2.32        | 5.15   |
| <i>D14ertd668e</i> | DNA segment, Chr 14, ERATO Doi 668, expressed                           | 1.89        | 1.71   |
| <i>Dact1</i>       | dapper, antagonist of beta-catenin, homolog 1 ( <i>Xenopus laevis</i> ) | 1.90        | 3.01   |
| <i>Ddah1</i>       | dimethylarginine dimethylaminohydrolase 1                               | 2.16        | 6.88   |
| <i>Dpysl3</i>      | dihydropyrimidinase-like 3                                              | 2.02        | 2.99   |
| <i>Dst</i>         | dystonin                                                                | 0.59        | 0.45   |
| <i>Dusp13</i>      | dual specificity phosphatase 13                                         | 0.46        | 0.45   |
| <i>Dysfip1</i>     | dysferlin interacting protein 1                                         | 0.47        | 0.21   |
| <i>Edil3</i>       | EGF-like repeats and discoidin I-like domains 3                         | 2.20        | 2.36   |
| <i>Efemp2</i>      | EGF-containing fibulin-like extracellular matrix protein 2              | 1.73        | 3.11   |
| <i>Emilin1</i>     | elastin microfibril interfacer 1                                        | 2.02        | 6.42   |
| <i>Epb41l3</i>     | erythrocyte membrane protein band 4.1-like 3                            | 1.56        | 2.45   |
| <i>F2r</i>         | coagulation factor II (thrombin) receptor                               | 1.62        | 3.25   |

|                      |                                                                                         |      |       |
|----------------------|-----------------------------------------------------------------------------------------|------|-------|
| <i>Fam114a1</i>      | family with sequence similarity 114, member A1                                          | 1.53 | 3.91  |
| <i>Fam134b</i>       | family with sequence similarity 134, member B                                           | 0.63 | 0.39  |
| <i>Fbn1</i>          | fibrillin 1                                                                             | 1.91 | 5.84  |
| <i>Fbn2</i>          | fibrillin 2                                                                             | 2.27 | 9.52  |
| <i>Fibin</i>         | fin bud initiation factor homolog (zebrafish)                                           | 2.16 | 3.05  |
| <i>Fkbp14</i>        | FK506 binding protein 14, 22 kDa                                                        | 1.72 | 3.55  |
| <i fn1<="" i=""></i> | fibronectin 1                                                                           | 2.02 | 2.89  |
| <i>Galnt11</i>       | UDP-N-acetyl-alpha-D-galactosamine:polypeptide N-acetylgalactosaminyltransferase-like 1 | 1.65 | 2.04  |
| <i>Glis3</i>         | GLIS family zinc finger 3                                                               | 2.14 | 1.85  |
| <i>Hif1a</i>         | hypoxia inducible factor 1, alpha subunit (basic helix-loop-helix transcription factor) | 1.46 | 3.83  |
| <i>Igf1</i>          | insulin-like growth factor 1 (somatomedin C)                                            | 1.88 | 5.00  |
| <i>Ikbip</i>         | IKBKB interacting protein                                                               | 1.41 | 3.35  |
| <i>Il1rl1</i>        | interleukin 1 receptor-like 1                                                           | 3.82 | 2.99  |
| <i>Islr</i>          | immunoglobulin superfamily containing leucine-rich repeat                               | 1.78 | 2.85  |
| <i>Kdelr3</i>        | KDEL (Lys-Asp-Glu-Leu) endoplasmic reticulum protein retention receptor 3               | 1.53 | 4.88  |
| <i>Leprel2</i>       | leprecan-like 2                                                                         | 1.75 | 6.49  |
| <i>Loxl1</i>         | lysyl oxidase-like 1                                                                    | 1.63 | 4.30  |
| <i>Loxl2</i>         | lysyl oxidase-like 2                                                                    | 1.71 | 5.45  |
| <i>Lsp1</i>          | lymphocyte-specific protein 1                                                           | 1.57 | 2.91  |
| <i>Ltbp2</i>         | latent transforming growth factor beta binding protein 2                                | 2.71 | 3.04  |
| <i>Meg3</i>          | maternally expressed 3                                                                  | 1.49 | 11.80 |
| <i>Mest</i>          | mesoderm specific transcript homolog (mouse)                                            | 4.07 | 8.41  |
| <i>Mfap4</i>         | microfibrillar-associated protein 4                                                     | 1.90 | 9.05  |
| <i>Mfap5</i>         | microfibrillar associated protein 5                                                     | 3.03 | 3.39  |
| <i>Mirg</i>          | miRNA containing gene                                                                   | 1.62 | 2.87  |
| <i>Mmp19</i>         | matrix metalloproteinase 19                                                             | 2.21 | 1.80  |
| <i>Mmp23b</i>        | matrix metalloproteinase 23B                                                            | 1.56 | 3.60  |
| <i>Mrc2</i>          | mannose receptor, C type 2                                                              | 1.66 | 3.11  |
| <i>Nid1</i>          | nidogen 1                                                                               | 1.59 | 4.25  |
| <i>Nov</i>           | nephroblastoma overexpressed gene                                                       | 2.83 | 23.44 |
| <i>Oaf</i>           | OAF homolog (Drosophila)                                                                | 1.84 | 2.30  |
| <i>P4ha3</i>         | prolyl 4-hydroxylase, alpha polypeptide III                                             | 2.55 | 3.23  |
| <i>Plat</i>          | plasminogen activator, tissue                                                           | 1.83 | 3.66  |

|                 |                                                                                                     |      |       |
|-----------------|-----------------------------------------------------------------------------------------------------|------|-------|
| <i>Prrx2</i>    | paired related homeobox 2                                                                           | 1.61 | 2.74  |
| <i>Ptx3</i>     | pentraxin 3, long                                                                                   | 3.02 | 8.50  |
| <i>Pycr1</i>    | pyrroline-5-carboxylate reductase 1                                                                 | 1.64 | 2.82  |
| <i>Rffl</i>     | ring finger and FYVE-like domain containing 1                                                       | 0.66 | 0.31  |
| <i>Serpinh1</i> | serpin peptidase inhibitor, clade H (heat shock protein 47), member 1, (collagen binding protein 1) | 1.70 | 2.52  |
| <i>Slc39a14</i> | solute carrier family 39 (zinc transporter), member 14                                              | 1.58 | 1.77  |
| <i>Srpx2</i>    | sushi-repeat-containing protein, X-linked 2                                                         | 2.16 | 6.68  |
| <i>Timp1</i>    | TIMP metalloproteinase inhibitor 1                                                                  | 2.71 | 10.04 |
| <i>Tnc</i>      | tenascin C                                                                                          | 2.36 | 9.30  |
| <i>Tnn</i>      | tenascin N                                                                                          | 3.43 | 10.51 |
| <i>Vcan</i>     | versican                                                                                            | 2.00 | 3.36  |
| <i>Wisp1</i>    | WNT1 inducible signaling pathway protein 1                                                          | 2.04 | 9.68  |
| <i>Zfpn2</i>    | zinc finger protein, multitype 2                                                                    | 2.77 | 1.97  |

**Supplementary Table 2:** Microarray-identified chemokine genes that are significantly regulated by mechanical loading (false discovery rate < 2 for at least one time point).

| Gene            |                                                                                       | Fold change |        |
|-----------------|---------------------------------------------------------------------------------------|-------------|--------|
|                 |                                                                                       | Day 6       | Day 14 |
| <i>Ccl11</i>    | chemokine (C-C motif) ligand 11                                                       | 2.92        | 1.66   |
| <i>Ccl2</i>     | chemokine (C-C motif) ligand 2                                                        | 2.44        | 3.42   |
| <i>Ccl7</i>     | chemokine (C-C motif) ligand 7                                                        | 2.61        | 2.92   |
| <i>Ccl8</i>     | chemokine (C-C motif) ligand 8                                                        | 1.45        | 2.34   |
| <i>Ccr1</i>     | chemokine (C-C motif) receptor 1                                                      | 1.22        | 5.03   |
| <i>Ccr2</i>     | chemokine (C-C motif) receptor 2                                                      | 1.30        | 2.89   |
| <i>Ccr5</i>     | chemokine (C-C motif) receptor 5                                                      | 1.49        | 2.02   |
| <i>Cxcl1</i>    | chemokine (C-X-C motif) ligand 1                                                      | 2.44        | 1.49   |
| <i>Cxcl16</i>   | chemokine (C-X-C motif) ligand 16                                                     | 1.05        | 1.85   |
| <i>Cmtm7</i>    | CKLF-like MARVEL transmembrane domain containing 7                                    | 1.50        | 1.69   |
| <i>Csf1r</i>    | colony stimulating factor 1 receptor                                                  | 1.09        | 2.73   |
| <i>Csf2ra</i>   | colony stimulating factor 2 receptor, alpha, low-affinity (granulocyte-macrophage)    | 1.13        | 1.72   |
| <i>Hif1a</i>    | hypoxia inducible factor 1, alpha subunit                                             | 1.46        | 3.83   |
| <i>Il13ra1</i>  | interleukin 13 receptor, alpha 1                                                      | 1.16        | 2.49   |
| <i>Il1rl1</i>   | interleukin 1 receptor-like 1                                                         | 3.82        | 2.99   |
| <i>Il27ra</i>   | interleukin 27 receptor, alpha                                                        | 1.27        | 1.47   |
| <i>Il2rg</i>    | interleukin 2 receptor, gamma chain                                                   | 1.33        | 2.39   |
| <i>Il33</i>     | interleukin 33                                                                        | 2.24        | 7.31   |
| <i>Il4ra</i>    | interleukin 4 receptor, alpha                                                         | 1.64        | 1.92   |
| <i>Lif</i>      | leukemia inhibitory factor                                                            | 1.82        | 1.39   |
| <i>Ltbp2</i>    | latent transforming growth factor beta binding protein 2                              | 2.71        | 3.04   |
| <i>Mmp2</i>     | matrix metalloproteinase 2                                                            | 1.29        | 2.50   |
| <i>Mmp9</i>     | matrix metalloproteinase 9                                                            | 1.37        | 2.16   |
| <i>Nfkbie</i>   | nuclear factor of kappa light polypeptide gene enhancer in B-cells inhibitor, epsilon | 1.34        | 2.26   |
| <i>Rgs5</i>     | regulator of G-protein signaling 5                                                    | 0.78        | 3.93   |
| <i>Tlr1</i>     | toll-like receptor 1                                                                  | 1.24        | 2.72   |
| <i>Tlr13</i>    | toll-like receptor 13                                                                 | 1.29        | 3.03   |
| <i>Tnfaip6</i>  | tumor necrosis factor alpha induced protein 6                                         | 2.39        | 1.46   |
| <i>Tnfrsf1b</i> | tumor necrosis factor receptor superfamily, member 1b                                 | 1.20        | 2.05   |
| <i>Trem2</i>    | triggering receptor expressed on myeloid cells 2                                      | 1.28        | 2.47   |

**Supplementary Table 3:** qPCR primer list for mouse genes and qPCR Taqman assays for human genes.

| <b>Mouse Gene</b> | <b>Forward Primer 5' → 3'</b> | <b>Reverse Primer 5' → 3'</b> |
|-------------------|-------------------------------|-------------------------------|
| <i>Coll1a1</i>    | GCTGTTCTTGCAGTGATAGGTG        | CTGGTTTGGAGAGAGCATGAC         |
| <i>Col3a1</i>     | CATTCCTCCCCTCCAGACTT          | CTGTGAATCATGTCCAAGTGGT        |
| <i>Ccl2</i>       | AATGAGTAGCAGCAGGTGAGTG        | GAAGCCAGCTCTCTCTTCCTC         |
| <i>Ctgf</i>       | CGCAGAACTTAGCCCTGTATGT        | GCTGACCTGGAGGAAAACATTA        |
| <i>Tgfb1</i>      | ATCTTTGCTGTCACAAGAGCAG        | TCTTTTGACGTCCTGGAGTTG         |
| <i>Tgfb3</i>      | TGAAAGGTGTGACATGGACAGT        | CGCTACATAGGTGGCAAGAATC        |
| <i>Mmp2</i>       | GCATCTACTTGCTGGACATCAG        | AGGAGGAGAAGGCTGTGTTCTT        |
| <i>Mmp9</i>       | TGGGAGGTATAGTGGGACACAT        | GCTTCCCTCTGAATAAAGACGA        |
| <i>Actb</i>       | ATGTTCAATGGGGTACTTCAGG        | CTGTATTCCCCTCCATCGTG          |
| <b>Human Gene</b> | <b>Taqman assay</b>           |                               |
| <i>COL1A1</i>     | Hs00164004_m1                 |                               |
| <i>COL3A1</i>     | Hs00943809_m1                 |                               |
| <i>ACTB</i>       | Hs9999903_m1                  |                               |
